# Supplementary material for: A procedural perspective on academic spin-off creation: the changing relative importance of the academic and the commercial sphere
Source: Springer Nature journal article supplement (doi:10.1007/s11187-023-00815-w), 2023-11-04
Supplement: MOESM1 [file 26267050]

## Electronic Supplementary Material:

### A procedural perspective on academic spin-off creation: The changing relative importance of the academic and the commercial sphere

Published in *Small Business Economics*, DOI: [10.1007/s11187-023-00815-w](https://doi.org/10.1007/s11187-023-00815-w)

Uwe Cantner<sup>1,2</sup>, Philip Doerr<sup>\*1,3</sup>, Maximilian Goethner<sup>1,4,5</sup>, Matthias Huegel<sup>1,6</sup>, and Martin Kalthaus<sup>2</sup>

<sup>1</sup>Friedrich Schiller University Jena, Department of Economics, Carl-Zeiß-Straße 3, 07743 Jena, Germany

<sup>2</sup>University of Southern Denmark, Department of Business & Management, Center for Integrative Innovation Management, Campusvej 55, 5230 Odense M, Denmark

<sup>3</sup>HHL Leipzig Graduate School of Management, HHL DIGITAL SPACE, Jahnallee 59, 04109 Leipzig, Germany

<sup>4</sup>IZA – Institute of Labor Economics, Schaumburg-Lippe-Straße 5–9, 53113 Bonn, Germany

<sup>5</sup>University of Twente, Faculty of Behavioural, Management and Social Sciences, Drienerlolaan 5, 7522 NB Enschede, The Netherlands

<sup>6</sup>University of Kassel, Institute of Economics and INCHER-Kassel, Moenchebergstraße 17, 34109 Kassel, Germany

## Contents

|          |                                                     |          |
|----------|-----------------------------------------------------|----------|
| <b>1</b> | <b>Non-response analysis and representativeness</b> | <b>2</b> |
| <b>2</b> | <b>Process schemes</b>                              | <b>3</b> |
| <b>3</b> | <b>Variables</b>                                    | <b>4</b> |
| 3.1      | Variable specifications . . . . .                   | 4        |
| 3.2      | Correlation tables . . . . .                        | 5        |
| <b>4</b> | <b>Additional estimations</b>                       | <b>8</b> |

---

\*Corresponding author: Philip Doerr, [philip.doerr@uni-jena.de](mailto:philip.doerr@uni-jena.de)

# 1 Non-response analysis and representativeness

**Table S1** Non-response analysis

| Variable                       | Approached (%) | Sample (%) | Sample - Approached |
|--------------------------------|----------------|------------|---------------------|
| Professor (=1)                 | 16.49          | 18.28      | 1.79                |
| Female (=1)                    | 37.56          | 36.73      | -0.83               |
| Basic                          | 16.06          | 15.23      | -0.83               |
| Between basic and applied      | 63.85          | 63.97      | 0.12                |
| Applied                        | 20.09          | 20.80      | 0.71                |
| Computer Science & Mathematics | 10.11          | 10.53      | 0.42                |
| Engineering                    | 14.04          | 16.36      | 2.32**              |
| Humanities                     | 12.78          | 9.66       | -3.12***            |
| Life Science                   | 13.50          | 14.97      | 1.47                |
| Medicine                       | 15.65          | 9.75       | -5.9***             |
| Physics & Chemistry            | 18.87          | 19.67      | 0.8                 |
| Social Sciences                | 15.05          | 19.06      | 4.01***             |
| N                              | 7,785          | 1,149      |                     |

*Note:* Group comparison based on Wilcoxon rank-sum tests as non-parametric alternative to two-sided *t*-test; Significance at \* $p < 0.1$ ; \*\* $p < 0.05$ ; \*\*\* $p < 0.01$

**Table S2** Representativeness

| Variable       | Germany (Universities) (%) | Sample (Universities) (%) |
|----------------|----------------------------|---------------------------|
| Professor (=1) | 18.63                      | 20.99                     |
| Female (=1)    | 40.20                      | 37.27                     |

*Note:* The comparison is only between the respondents affiliated to universities and universities of applied science, not to research organizations; Data for the overall population of scientists at universities in Germany is taken from [Statistisches Bundesamt \(2020\)](#)

## 2 Process schemes

**Table S3** Overview of process schemes on academic entrepreneurship

|                               | Research               | <b>T1</b> | Opportunity framing       | <b>T2</b> | Pre-Spin-off                     | <b>T3</b> | Spin-off                                   |
|-------------------------------|------------------------|-----------|---------------------------|-----------|----------------------------------|-----------|--------------------------------------------|
| Roberts and Malonet (1996)    | Research & Development |           |                           |           | Invention                        |           | New venture creation & Product development |
| Ndonzuau et al. (2002)        |                        |           | Generating business ideas |           | Finalizing new venture projects  |           | Launch                                     |
| Vohora et al. (2004)          | Research               |           | Opportunity framing       |           | Pre-organization                 |           | Start-up                                   |
| Clarysse and Moray (2004)     |                        |           | Idea                      |           | Pre-start-up                     |           | Spin-off's proof of viability              |
| Vanaelst et al. (2006)        |                        |           | Opportunity screening     |           | Gestation                        |           | Post-creation                              |
| Mustar et al. (2008)          |                        |           | Pre-seed                  |           | Seed & Pre-start-up              |           | Consolidation                              |
| Rasmussen (2011)              | Research               |           | Opportunity framing       |           | Proof of viability               |           |                                            |
| Fernández-Alles et al. (2015) |                        |           |                           |           | Creation and initial development |           |                                            |

*Note:* T: Transition; Source: Own elaboration

## 3 Variables

### 3.1 Variable specifications

**Table S4** List of approached organizations and their research focus

| Number                                                   | Organization                                                                                              | Organizational focus      |
|----------------------------------------------------------|-----------------------------------------------------------------------------------------------------------|---------------------------|
| <i>Universities and universities of applied sciences</i> |                                                                                                           |                           |
| 1                                                        | Bauhaus-Universität Weimar                                                                                | between basic and applied |
| 2                                                        | Duale Hochschule Gera-Eisenach                                                                            | applied                   |
| 3                                                        | Ernst-Abbe-Hochschule Jena                                                                                | applied                   |
| 4                                                        | Fachhochschule Erfurt                                                                                     | applied                   |
| 5                                                        | Friedrich-Schiller-Universität Jena                                                                       | between basic and applied |
| 6                                                        | Hochschule für Musik FRANZ LISZT Weimar                                                                   | applied                   |
| 7                                                        | Hochschule Nordhausen                                                                                     | applied                   |
| 8                                                        | Hochschule Schmalkalden                                                                                   | applied                   |
| 9                                                        | SRH Hochschule für Gesundheit                                                                             | applied                   |
| 10                                                       | Technische Universität Ilmenau                                                                            | between basic and applied |
| 11                                                       | Universität Erfurt                                                                                        | between basic and applied |
| <i>Research institutes</i>                               |                                                                                                           |                           |
| 12                                                       | Forschungsinstitut für Mikrosensorik                                                                      | applied                   |
| 13                                                       | Forschungszentrum für Medizintechnik und Biotechnologie                                                   | applied                   |
| 14                                                       | Fraunhofer-Institut für Angewandte Optik und Feinmechanik                                                 | applied                   |
| 15                                                       | Fraunhofer-Institut für Digitale Medientechnologie                                                        | applied                   |
| 16                                                       | Fraunhofer-Institut für Keramische Technologien und Systeme                                               | applied                   |
| 17                                                       | Fraunhofer-Institut für Optronik, Systemtechnik und Bildauswertung Institutsteil Angewandte Systemtechnik | applied                   |
| 18                                                       | Friedrich-Loeffler-Institut für bakterielle Infektionen und Zoonosen                                      | applied                   |
| 19                                                       | Friedrich-Loeffler-Institut für molekulare Pathogenese                                                    | applied                   |
| 20                                                       | Gesellschaft für Fertigungstechnik und Entwicklung                                                        | applied                   |
| 21                                                       | Günter-Köhler-Institut für Fügetechnik und Werkstoffprüfung                                               | applied                   |
| 22                                                       | Helmholtz-Institut Jena                                                                                   | basic                     |
| 23                                                       | Innovent                                                                                                  | applied                   |
| 24                                                       | Institut für Angewandte Bauforschung                                                                      | applied                   |
| 25                                                       | Institut für Bioprocess- und Analysenmesstechnik Heiligenstadt                                            | applied                   |
| 26                                                       | Institut für Datenwissenschaften                                                                          | applied                   |
| 27                                                       | Institut für Mikroelektronik- und Mechatronik-Systeme                                                     | applied                   |
| 28                                                       | Leibniz-Institut für Alternsforschung - Fritz-Lipmann-Institut e.V.                                       | basic                     |
| 29                                                       | Leibniz-Institut für Naturstoff-Forschung und Infektionsbiologie Hans-Knöll-Institut                      | basic                     |
| 30                                                       | Leibniz-Institut für Photonische Technologien                                                             | basic                     |
| 31                                                       | Materialforschungs- und -prüfanstalt                                                                      | applied                   |
| 32                                                       | Max-Planck-Institut für Biogeochemie                                                                      | basic                     |
| 33                                                       | Max-Planck-Institut für chemische Ökologie                                                                | basic                     |
| 34                                                       | Max-Planck-Institut für Menschheitsgeschichte                                                             | basic                     |
| 35                                                       | Textilforschungsinstitut Thüringen-Vogtland                                                               | applied                   |
| 36                                                       | Thüringer Landessternwarte Tautenburg                                                                     | basic                     |
| 37                                                       | Thüringisches Institut für Textil- u. Kunststoff-Forschung                                                | applied                   |

## 3.2 Correlation tables

**Table S5** Pearson correlation coefficients between the variables of transition 1 (n=1,149)

|                                                    | 1        | 2        | 3        | 4        | 5        | 6        | 7        | 8        | 9        | 10       | 11       | 12       | 13    | 14       | 15       | 16       | 17       | 18       | 19       | 20       | 21       | 22       |
|----------------------------------------------------|----------|----------|----------|----------|----------|----------|----------|----------|----------|----------|----------|----------|-------|----------|----------|----------|----------|----------|----------|----------|----------|----------|
| <i>Dependent variable</i>                          |          |          |          |          |          |          |          |          |          |          |          |          |       |          |          |          |          |          |          |          |          |          |
| 1 Transition 1 (=1)                                |          |          |          |          |          |          |          |          |          |          |          |          |       |          |          |          |          |          |          |          |          |          |
| <i>Academic sphere</i>                             |          |          |          |          |          |          |          |          |          |          |          |          |       |          |          |          |          |          |          |          |          |          |
| 2 Professor (=1)                                   | 0.08***  |          |          |          |          |          |          |          |          |          |          |          |       |          |          |          |          |          |          |          |          |          |
| 3 Time devoted to research                         | -0.05*   | -0.35*** |          |          |          |          |          |          |          |          |          |          |       |          |          |          |          |          |          |          |          |          |
| 4 Number of publications                           | 0.07**   | 0.32***  | -0.06**  |          |          |          |          |          |          |          |          |          |       |          |          |          |          |          |          |          |          |          |
| 5 Average impact factor                            | -0.04    | 0.07**   | 0.14***  | 0.28***  |          |          |          |          |          |          |          |          |       |          |          |          |          |          |          |          |          |          |
| 6 Basic research                                   | 0.15***  | 0.11***  | 0.20***  | 0.15***  | 0.14***  |          |          |          |          |          |          |          |       |          |          |          |          |          |          |          |          |          |
| 7 Applied research                                 | 0.22***  | 0.05*    | -0.07*** | -0.04    | -0.15*** | 0.15***  |          |          |          |          |          |          |       |          |          |          |          |          |          |          |          |          |
| <i>Commercial sphere</i>                           |          |          |          |          |          |          |          |          |          |          |          |          |       |          |          |          |          |          |          |          |          |          |
| 8 Share of publications with industry              | 0.08***  | 0.00     | 0.01     | 0.01     | 0.06**   | -0.03    | 0.13***  |          |          |          |          |          |       |          |          |          |          |          |          |          |          |          |
| 9 Time devoted to KTT                              | 0.15***  | 0.02     | -0.25*** | -0.03    | -0.03    | 0.09***  | 0.31***  | 0.07**   |          |          |          |          |       |          |          |          |          |          |          |          |          |          |
| 10 Disclosed IP                                    | 0.19***  | 0.13***  | -0.05*   | 0.18***  | 0.04     | 0.12***  | 0.19***  | 0.09***  | 0.20***  |          |          |          |       |          |          |          |          |          |          |          |          |          |
| 11 Work experience outside academia                | 0.13***  | 0.20***  | -0.25*** | -0.05*   | -0.22*** | -0.01    | 0.23***  | 0.05*    | 0.12***  | 0.04     |          |          |       |          |          |          |          |          |          |          |          |          |
| <i>Control variables</i>                           |          |          |          |          |          |          |          |          |          |          |          |          |       |          |          |          |          |          |          |          |          |          |
| 12 Female (=1)                                     | -0.10*** | -0.12*** | 0.03     | -0.12*** | -0.07**  | -0.03    | -0.03    | -0.07**  | 0.00     | -0.07**  | -0.11*** |          |       |          |          |          |          |          |          |          |          |          |
| 13 Risk willingness                                | 0.14***  | 0.10***  | 0.02     | 0.06**   | 0.00     | 0.23***  | 0.13***  | 0.03     | 0.04     | 0.07**   | 0.19***  | -0.04    |       |          |          |          |          |          |          |          |          |          |
| 14 Organizational focus: between basic and applied | -0.05*   | -0.04    | -0.03    | 0.00     | -0.05*   | -0.03    | -0.12*** | -0.10*** | -0.14*** | -0.12*** | -0.11*** | 0.03     | -0.04 |          |          |          |          |          |          |          |          |          |
| 15 Organizational focus: basic                     | -0.05    | -0.14*** | 0.27***  | 0.12***  | 0.26***  | 0.14***  | -0.15*** | -0.01    | -0.01    | -0.03    | -0.16*** | 0.01     | 0.04  | -0.56*** |          |          |          |          |          |          |          |          |
| 16 Organizational focus: applied                   | 0.11***  | 0.18***  | -0.20*** | -0.11*** | -0.17*** | -0.08*** | 0.28***  | 0.13***  | 0.18***  | 0.17***  | 0.26***  | -0.04    | 0.01  | -0.68*** | -0.22*** |          |          |          |          |          |          |          |
| 17 Discipline: Computer Science and Mathematics    | 0.07**   | -0.01    | 0.01     | -0.04    | -0.02    | 0.02     | 0.10***  | 0.06**   | -0.01    | 0.00     | 0.00     | -0.14*** | 0.00  | 0.16***  | -0.15*** | -0.06*   |          |          |          |          |          |          |
| 18 Discipline: Engineering                         | 0.07**   | 0.03     | -0.09*** | -0.11*** | -0.15*** | -0.03    | 0.24***  | 0.17***  | 0.15***  | 0.18***  | 0.14***  | -0.08*** | 0.03  | -0.17*** | -0.19*** | 0.37***  | -0.15*** |          |          |          |          |          |
| 19 Discipline: Humanities                          | -0.03    | 0.01     | -0.04    | -0.10*** | -0.13*** | 0.09***  | -0.08**  | -0.05*   | 0.03     | -0.05*   | 0.12***  | 0.10***  | 0.04  | -0.04    | 0.05*    | 0.00     | -0.11*** | -0.14*** |          |          |          |          |
| 20 Discipline: Life Sciences                       | -0.03    | -0.07**  | 0.15***  | 0.04     | 0.15***  | 0.01     | -0.13*** | -0.01    | -0.05*   | -0.06**  | -0.13*** | 0.06**   | -0.01 | -0.19*** | 0.34***  | -0.08*** | -0.14*** | -0.19*** | -0.14*** |          |          |          |
| 21 Discipline: Medicine                            | -0.03    | 0.00     | -0.04    | 0.17***  | 0.12***  | -0.06**  | 0.00     | -0.03    | -0.05*   | -0.04    | -0.01    | 0.11***  | -0.01 | 0.18***  | -0.14*** | -0.09*** | -0.11*** | -0.15*** | -0.11*** | -0.14*** |          |          |
| 22 Discipline: Physics and Chemistry               | 0.03     | -0.09*** | 0.18***  | 0.16***  | 0.16***  | 0.07**   | -0.08*** | -0.05*   | 0.03     | 0.07**   | -0.17*** | -0.07**  | 0.00  | -0.12*** | 0.25***  | -0.08*** | -0.17*** | -0.22*** | -0.16*** | -0.21*** | -0.16*** |          |
| 23 Discipline: Social Sciences                     | -0.08*** | 0.13***  | -0.17*** | -0.12*** | -0.13*** | -0.09*** | -0.06*   | -0.07**  | -0.09*** | -0.12*** | 0.07**   | 0.04     | -0.04 | 0.22***  | -0.21*** | -0.08*** | -0.17*** | -0.21*** | -0.16*** | -0.20*** | -0.16*** | -0.24*** |

Note: Significance at \*p<0.1; \*\*p<0.05; \*\*\*p<0.01

**Table S6** Pearson correlation coefficients between the variables of transition 2 (n=249)

|                                                    | 1        | 2        | 3        | 4       | 5        | 6       | 7        | 8       | 9        | 10      | 11       | 12      | 13    | 14       | 15       | 16      | 17       | 18       | 19      | 20       | 21      | 22       |
|----------------------------------------------------|----------|----------|----------|---------|----------|---------|----------|---------|----------|---------|----------|---------|-------|----------|----------|---------|----------|----------|---------|----------|---------|----------|
| <i>Dependent variable</i>                          |          |          |          |         |          |         |          |         |          |         |          |         |       |          |          |         |          |          |         |          |         |          |
| 1 Transition 2 (=1)                                |          |          |          |         |          |         |          |         |          |         |          |         |       |          |          |         |          |          |         |          |         |          |
| <i>Academic sphere</i>                             |          |          |          |         |          |         |          |         |          |         |          |         |       |          |          |         |          |          |         |          |         |          |
| 2 Professor (=1)                                   | 0.17***  |          |          |         |          |         |          |         |          |         |          |         |       |          |          |         |          |          |         |          |         |          |
| 3 Time devoted to research                         | -0.18*** | -0.39*** |          |         |          |         |          |         |          |         |          |         |       |          |          |         |          |          |         |          |         |          |
| 4 Number of publications                           | -0.06    | 0.30***  | -0.03    |         |          |         |          |         |          |         |          |         |       |          |          |         |          |          |         |          |         |          |
| 5 Average impact factor                            | -0.16**  | 0.15**   | 0.07     | 0.28*** |          |         |          |         |          |         |          |         |       |          |          |         |          |          |         |          |         |          |
| 6 Basic research                                   | 0.05     | 0.09     | 0.10     | 0.10    | 0.13**   |         |          |         |          |         |          |         |       |          |          |         |          |          |         |          |         |          |
| 7 Applied research                                 | 0.24***  | 0.10*    | -0.09    | -0.10   | -0.13**  | 0.10    |          |         |          |         |          |         |       |          |          |         |          |          |         |          |         |          |
| <i>Commercial sphere</i>                           |          |          |          |         |          |         |          |         |          |         |          |         |       |          |          |         |          |          |         |          |         |          |
| 8 Share of publications with industry              | 0.07     | -0.01    | 0.02     | -0.03   | 0.14**   | -0.08   | 0.06     |         |          |         |          |         |       |          |          |         |          |          |         |          |         |          |
| 9 Time devoted to KTT                              | 0.27***  | 0.03     | -0.36*** | 0.00    | 0.00     | 0.13**  | 0.31***  | 0.01    |          |         |          |         |       |          |          |         |          |          |         |          |         |          |
| 10 Disclosed IP                                    | 0.21***  | 0.19***  | -0.13**  | 0.12*   | 0.07     | 0.15**  | 0.20***  | 0.09    | 0.28***  |         |          |         |       |          |          |         |          |          |         |          |         |          |
| 11 Work experience outside academia                | 0.28***  | 0.21***  | -0.25*** | 0.04    | -0.31*** | 0.01    | 0.26***  | 0.05    | 0.12*    | -0.03   |          |         |       |          |          |         |          |          |         |          |         |          |
| <i>Control variables</i>                           |          |          |          |         |          |         |          |         |          |         |          |         |       |          |          |         |          |          |         |          |         |          |
| 12 Female (=1)                                     | -0.03    | -0.05    | 0.00     | -0.03   | -0.07    | 0.06    | -0.01    | -0.10   | -0.04    | -0.03   | -0.04    |         |       |          |          |         |          |          |         |          |         |          |
| 13 Risk willingness                                | 0.15**   | 0.12*    | 0.04     | 0.03    | -0.04    | 0.16*** | 0.11*    | 0.03    | 0.02     | 0.03    | 0.19***  | -0.02   |       |          |          |         |          |          |         |          |         |          |
| 14 Organizational focus: between basic and applied | -0.11*   | -0.10    | 0.07     | 0.04    | -0.08    | 0.09    | -0.14**  | -0.13** | -0.16*** | -0.11*  | -0.08    | -0.04   | 0.05  |          |          |         |          |          |         |          |         |          |
| 15 Organizational focus: basic                     | -0.09    | -0.15**  | 0.22***  | 0.12*   | 0.25***  | 0.06    | -0.22*** | 0.08    | -0.06    | -0.07   | -0.18*** | 0.08    | 0.01  | -0.44*** |          |         |          |          |         |          |         |          |
| 16 Organizational focus: applied                   | 0.18***  | 0.22***  | -0.23*** | -0.13** | -0.09    | -0.13** | 0.31***  | 0.08    | 0.22***  | 0.17*** | 0.22***  | -0.01   | -0.06 | -0.77*** | -0.24*** |         |          |          |         |          |         |          |
| 17 Discipline: Computer Science and Mathematics    | 0.02     | 0.04     | 0.09     | -0.06   | -0.01    | 0.05    | 0.17***  | -0.03   | -0.02    | -0.02   | 0.01     | -0.12*  | 0.01  | 0.16**   | -0.15**  | -0.06   |          |          |         |          |         |          |
| 18 Discipline: Engineering                         | 0.08     | -0.09    | -0.06    | -0.13** | -0.11*   | -0.05   | 0.20***  | 0.09    | 0.12*    | 0.21*** | 0.07     | -0.08   | -0.03 | -0.11*   | -0.19*** | 0.25*** | -0.21*** |          |         |          |         |          |
| 19 Discipline: Humanities                          | -0.02    | -0.06    | 0.01     | -0.08   | -0.02    | 0.14**  | -0.12**  | 0.00    | 0.00     | -0.03   | 0.06     | 0.18*** | 0.02  | -0.08    | 0.21***  | -0.06   | -0.12*   | -0.15**  |         |          |         |          |
| 20 Discipline: Life Sciences                       | -0.14**  | 0.04     | 0.10     | 0.03    | 0.14**   | -0.03   | -0.12*   | 0.11*   | -0.12*   | -0.12*  | -0.08    | 0.09    | 0.05  | -0.22*** | 0.34***  | -0.01   | -0.16**  | -0.20*** | -0.11*  |          |         |          |
| 21 Discipline: Medicine                            | -0.05    | 0.11*    | -0.11*   | 0.24*** | 0.07     | -0.06   | -0.10*   | -0.06   | -0.11*   | -0.02   | -0.01    | 0.05    | -0.01 | 0.13**   | -0.11*   | -0.06   | -0.12*   | -0.15**  | -0.09   | -0.11*   |         |          |
| 22 Discipline: Physics and Chemistry               | 0.00     | -0.05    | 0.07     | 0.14**  | 0.15**   | 0.06    | -0.05    | -0.07   | 0.10     | 0.07    | -0.13**  | -0.09   | -0.01 | -0.03    | 0.10     | -0.04   | -0.22*** | -0.28*** | -0.16** | -0.20*** | -0.16** |          |
| 23 Discipline: Social Sciences                     | 0.07     | 0.06     | -0.12*   | -0.11*  | -0.22*** | -0.09   | -0.04    | -0.05   | -0.04    | -0.14** | 0.11*    | 0.05    | -0.02 | 0.18***  | -0.14**  | -0.09   | -0.16**  | -0.20*** | -0.12*  | -0.15**  | -0.12*  | -0.21*** |

Note: Significance at \*p<0.1; \*\*p<0.05; \*\*\*p<0.01

**Table S7** Pearson correlation coefficients between the variables of transition 3 (n=145)

|                                                    | 1      | 2        | 3        | 4       | 5        | 6       | 7       | 8      | 9       | 10      | 11     | 12      | 13     | 14       | 15       | 16      | 17       | 18       | 19     | 20      | 21     | 22       |
|----------------------------------------------------|--------|----------|----------|---------|----------|---------|---------|--------|---------|---------|--------|---------|--------|----------|----------|---------|----------|----------|--------|---------|--------|----------|
| <i>Dependent variable</i>                          |        |          |          |         |          |         |         |        |         |         |        |         |        |          |          |         |          |          |        |         |        |          |
| 1 Transition 3 (=1)                                |        |          |          |         |          |         |         |        |         |         |        |         |        |          |          |         |          |          |        |         |        |          |
| <i>Academic sphere</i>                             |        |          |          |         |          |         |         |        |         |         |        |         |        |          |          |         |          |          |        |         |        |          |
| 2 Professor (=1)                                   | 0.05   |          |          |         |          |         |         |        |         |         |        |         |        |          |          |         |          |          |        |         |        |          |
| 3 Time devoted to research                         | -0.03  | -0.37*** |          |         |          |         |         |        |         |         |        |         |        |          |          |         |          |          |        |         |        |          |
| 4 Number of publications                           | -0.14* | 0.26***  | -0.06    |         |          |         |         |        |         |         |        |         |        |          |          |         |          |          |        |         |        |          |
| 5 Average impact factor                            | -0.02  | 0.17**   | 0.02     | 0.30*** |          |         |         |        |         |         |        |         |        |          |          |         |          |          |        |         |        |          |
| 6 Basic research                                   | 0.04   | 0.20**   | 0.08     | 0.14*   | 0.16*    |         |         |        |         |         |        |         |        |          |          |         |          |          |        |         |        |          |
| 7 Applied research                                 | 0.03   | 0.08     | -0.06    | -0.08   | -0.07    | 0.19**  |         |        |         |         |        |         |        |          |          |         |          |          |        |         |        |          |
| <i>Commercial sphere</i>                           |        |          |          |         |          |         |         |        |         |         |        |         |        |          |          |         |          |          |        |         |        |          |
| 8 Share of publications with industry              | -0.08  | 0.00     | -0.03    | -0.03   | 0.18**   | -0.14*  | 0.07    |        |         |         |        |         |        |          |          |         |          |          |        |         |        |          |
| 9 Time devoted to KTT                              | 0.12   | -0.04    | -0.37*** | 0.01    | 0.03     | 0.18**  | 0.26*** | -0.02  |         |         |        |         |        |          |          |         |          |          |        |         |        |          |
| 10 Disclosed IP                                    | -0.05  | 0.19**   | -0.12    | 0.17**  | 0.17**   | 0.19**  | 0.13    | 0.08   | 0.24*** |         |        |         |        |          |          |         |          |          |        |         |        |          |
| 11 Work experience outside academia                | 0.02   | 0.17**   | -0.22*** | 0.02    | -0.30*** | 0.00    | 0.23*** | 0.11   | 0.06    | -0.10   |        |         |        |          |          |         |          |          |        |         |        |          |
| <i>Control variables</i>                           |        |          |          |         |          |         |         |        |         |         |        |         |        |          |          |         |          |          |        |         |        |          |
| 12 Female (=1)                                     | -0.12  | -0.12    | 0.08     | -0.01   | -0.22*** | 0.09    | -0.02   | -0.16* | -0.05   | -0.01   | -0.06  |         |        |          |          |         |          |          |        |         |        |          |
| 13 Risk willingness                                | 0.18** | 0.14*    | 0.21**   | 0.03    | 0.11     | 0.14*   | 0.13    | 0.03   | -0.01   | 0.00    | 0.08   | -0.01   |        |          |          |         |          |          |        |         |        |          |
| 14 Organizational focus: between basic and applied | 0.09   | -0.15*   | 0.11     | 0.04    | 0.03     | 0.20**  | -0.12   | -0.13  | -0.20** | -0.13   | -0.11  | -0.09   | 0.02   |          |          |         |          |          |        |         |        |          |
| 15 Organizational focus: basic                     | 0.09   | -0.16**  | 0.19**   | 0.11    | 0.04     | -0.06   | -0.13   | 0.03   | -0.01   | -0.01   | -0.13  | 0.12    | 0.19** | -0.36*** |          |         |          |          |        |         |        |          |
| 16 Organizational focus: applied                   | -0.14* | 0.26***  | -0.23*** | -0.11   | -0.06    | -0.17** | 0.20**  | 0.12   | 0.21**  | 0.14*   | 0.20** | 0.01    | -0.14* | -0.82*** | -0.24*** |         |          |          |        |         |        |          |
| 17 Discipline: Computer Science and Mathematics    | 0.05   | 0.01     | 0.13     | -0.08   | -0.07    | 0.08    | 0.15*   | -0.02  | -0.08   | -0.04   | -0.04  | -0.08   | 0.00   | 0.15*    | -0.14*   | -0.08   |          |          |        |         |        |          |
| 18 Discipline: Engineering                         | -0.14* | -0.09    | -0.01    | -0.11   | 0.00     | -0.07   | 0.19**  | 0.10   | 0.13    | 0.17**  | 0.05   | -0.12   | -0.11  | -0.16**  | -0.18**  | 0.28*** | -0.24*** |          |        |         |        |          |
| 19 Discipline: Humanities                          | 0.06   | -0.08    | 0.03     | -0.07   | -0.13    | 0.02    | -0.03   | -0.01  | 0.00    | 0.01    | 0.04   | 0.30*** | 0.07   | -0.05    | 0.17**   | -0.05   | -0.12    | -0.16*   |        |         |        |          |
| 20 Discipline: Life Sciences                       | 0.06   | 0.06     | 0.11     | -0.07   | 0.00     | -0.07   | -0.12   | 0.16*  | -0.07   | -0.10   | -0.02  | -0.02   | 0.12   | -0.05    | 0.31***  | -0.13   | -0.13    | -0.18**  | -0.09  |         |        |          |
| 21 Discipline: Medicine                            | -0.08  | 0.18**   | -0.08    | 0.30*** | 0.13     | -0.03   | -0.15*  | -0.04  | -0.18** | -0.03   | -0.11  | 0.02    | 0.03   | 0.08     | -0.09    | -0.03   | -0.12    | -0.15*   | -0.08  | -0.09   |        |          |
| 22 Discipline: Physics and Chemistry               | -0.07  | -0.10    | 0.04     | 0.15*   | 0.19**   | 0.14*   | -0.06   | -0.13  | 0.17**  | 0.08    | -0.09  | -0.05   | 0.01   | -0.08    | 0.16**   | -0.02   | -0.23*** | -0.30*** | -0.15* | -0.17** | -0.14* |          |
| 23 Discipline: Social Sciences                     | 0.17** | 0.10     | -0.21**  | -0.07   | -0.15*   | -0.08   | -0.08   | -0.03  | -0.08   | -0.16** | 0.14   | 0.05    | -0.05  | 0.15*    | -0.14*   | -0.08   | -0.18**  | -0.24*** | -0.12  | -0.13   | -0.12  | -0.23*** |

Note: Significance at \*p<0.1; \*\*p<0.05; \*\*\*p<0.01

## 4 Additional estimations

**Table S8** Logit regression results and dominance analysis for Transition 2 and Transition 3 without number of publications

|                                     | (2a)<br>Transition 2<br><i>Opportunity framing to<br/>Pre-spin-off</i> | (3a)<br>Transition 3<br><i>Pre-spin-off to Spin-off</i> |
|-------------------------------------|------------------------------------------------------------------------|---------------------------------------------------------|
| <i>Academic sphere</i>              |                                                                        |                                                         |
| Professor (=1)                      | 0.860* (0.456)                                                         | 0.202 (0.543)                                           |
| Time devoted to research            | 0.002 (0.008)                                                          | 0.002 (0.011)                                           |
| Average impact factor               | -0.528** (0.228)                                                       | -0.065 (0.346)                                          |
| Basic research                      | 0.059 (0.221)                                                          | -0.043 (0.300)                                          |
| Applied research                    | 0.100 (0.223)                                                          | 0.061 (0.298)                                           |
| <b>Joint <math>R_A^2</math></b>     | <b>0.051 (27.6%)</b>                                                   | <b>0.003 (2.4%)</b>                                     |
| <i>Commercial sphere</i>            |                                                                        |                                                         |
| Share of publications with industry | 1.223 (1.147)                                                          | -1.788 (1.548)                                          |
| Time devoted to KTT                 | 0.051** (0.020)                                                        | 0.027* (0.015)                                          |
| Disclosed IP                        | 0.610** (0.283)                                                        | 0.040 (0.298)                                           |
| Work experience outside academia    | 0.226* (0.118)                                                         | -0.036 (0.142)                                          |
| <b>Joint <math>R_C^2</math></b>     | <b>0.095 (51.5%)</b>                                                   | <b>0.021 (17.7%)</b>                                    |
| <i>Control variables</i>            |                                                                        |                                                         |
| Female (=1)                         | 0.068 (0.342)                                                          | -0.955** (0.485)                                        |
| Risk willingness                    | 0.112 (0.077)                                                          | 0.158 (0.103)                                           |
| Organizational focus: basic         | 0.680 (0.478)                                                          | 0.462 (0.726)                                           |
| Organizational focus: applied       | 0.394 (0.403)                                                          | -0.453 (0.478)                                          |
| Discipline: Engineering             | -0.067 (0.531)                                                         | -0.731 (0.621)                                          |
| Discipline: Humanities              | -0.452 (0.675)                                                         | 0.482 (0.846)                                           |
| Discipline: Life Sciences           | -0.830 (0.625)                                                         | -0.003 (0.806)                                          |
| Discipline: Medicine                | -0.206 (0.661)                                                         | -0.642 (0.895)                                          |
| Discipline: Physics and Chemistry   | -0.115 (0.523)                                                         | -0.781 (0.620)                                          |
| Discipline: Social Sciences         | 0.284 (0.596)                                                          | 0.856 (0.738)                                           |
| <b>Joint <math>R_Z^2</math></b>     | <b>0.038 (20.9%)</b>                                                   | <b>0.096 (79.9%)</b>                                    |
| Constant                            | -1.977* (1.033)                                                        | -1.290 (1.484)                                          |
| <i>N</i>                            | 249                                                                    | 145                                                     |
| Log Likelihood                      | -138.055                                                               | -87.579                                                 |
| Akaike Inf. Crit.                   | 316.110                                                                | 215.159                                                 |
| McFadden $R^2$                      | 0.184                                                                  | 0.12                                                    |

*Note:* A: Academic sphere, C: Commercial sphere, Z: Controls;  
Significance at \* $p < 0.1$ ; \*\* $p < 0.05$ ; \*\*\* $p < 0.01$ ; Robust standard errors in parentheses



## References

- Clarysse, B. and Moray, N. (2004). “A process study of entrepreneurial team formation: the case of a research-based spin-off.” *Journal of Business Venturing*, 19(1), 55–79. doi:10.1016/S0883-9026(02)00113-1.
- Fernández-Alles, M., Camelo-Ordaz, C., and Franco-Leal, N. (2015). “Key resources and actors for the evolution of academic spin-offs.” *The Journal of Technology Transfer*, 40(6), 976–1002. doi:10.1007/s10961-014-9387-2.
- Mustar, P., Wright, M., and Clarysse, B. (2008). “University spin-off firms: lessons from ten years of experience in Europe.” *Science and Public Policy*, 35(2), 67–80.
- Ndonzuau, F. N., Pirnay, F., and Surlemont, B. (2002). “A stage model of academic spin-off creation.” *Technovation*, 22(5), 281–289. doi:10.1016/S0166-4972(01)00019-0.
- Rasmussen, E. (2011). “Understanding academic entrepreneurship: Exploring the emergence of university spin-off ventures using process theories.” *International Small Business Journal*, 29(5), 448–471. doi:10.1177/0266242610385395.
- Roberts, E. B. and Malonet, D. E. (1996). “Policies and structures for spinning off new companies from research and development organizations.” *R&D Management*, 26(1), 17–48. doi:10.1111/j.1467-9310.1996.tb00927.x.
- Statistisches Bundesamt (2020). *Bildung und Kultur*, Vol. Reihe 4.4 of *Fachserie 11*. Statistisches Bundesamt (Destatis).
- Vanaelst, I., Clarysse, B., Wright, M., Lockett, A., Moray, N., and S’Jegers, R. (2006). “Entrepreneurial Team Development in Academic Spinouts: An Examination of Team Heterogeneity.” *Entrepreneurship Theory and Practice*, 30(2), 249–271. doi:10.1111/j.1540-6520.2006.00120.x.
- Vohora, A., Wright, M., and Lockett, A. (2004). “Critical junctures in the development of university high-tech spinout companies.” *Research Policy*, 33(1), 147–175. doi:10.1016/S0048-7333(03)00107-0.
